# Supplementary material
Source: publisher site journal article supplement (https://www.dovepress.com/article/362823)
Supplement: Supplementary file 1 [file get_supplementary_file.php]

**Supplementary materials**


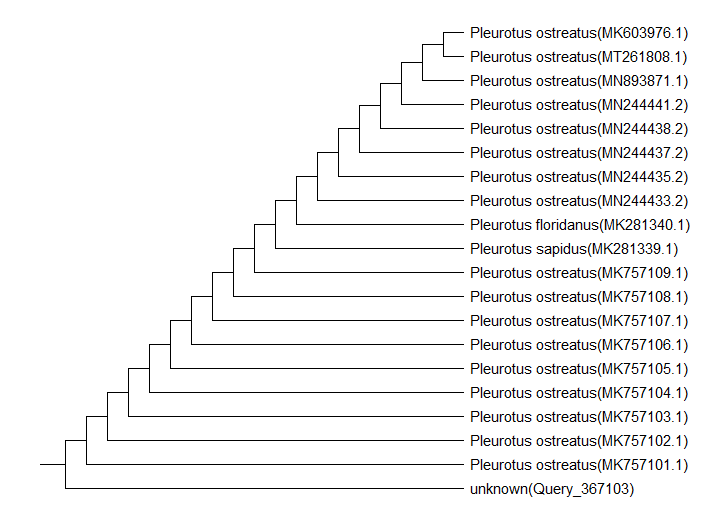


**Figure S1.** The phylogenetic tree based on partial sequencing of ITS1 and ITS4 ribosomal RNA gene showing relationship neighbor-joining between identified mushroom species *P. ostreatus* and other closely related sequences on NCBI GenBank reference database


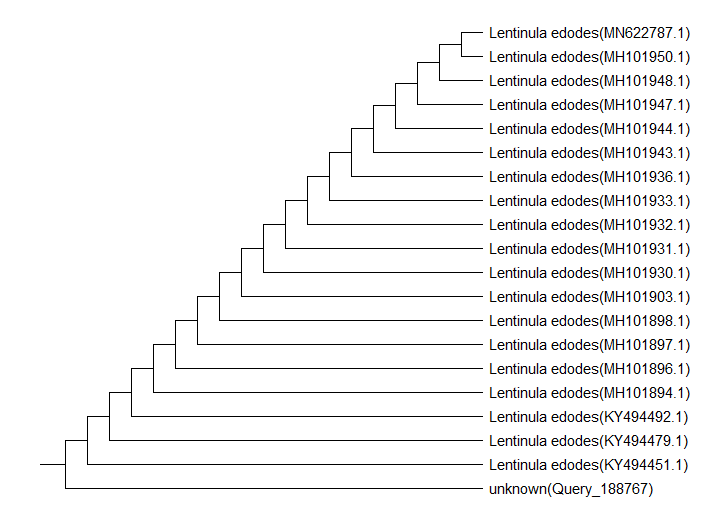


**Figure S2.** The phylogenetic tree based on partial sequencing of ITS1 and ITS4 ribosomal RNA gene showing relationship neighbor-joining between identified mushroom species *L. edodes* and other closely related sequences on NCBI GenBank reference database


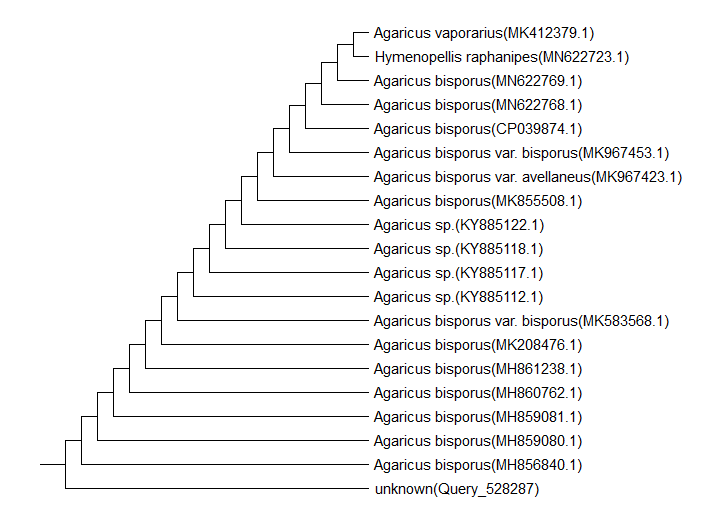


**Figure S3.** The phylogenetic tree based on partial sequencing of ITS1 and ITS4 ribosomal RNA gene showing relationship neighbor-joining between identified mushroom species *A. bisporus* and other closely related sequences on NCBI GenBank reference database

**Docking Results:**

1. lead


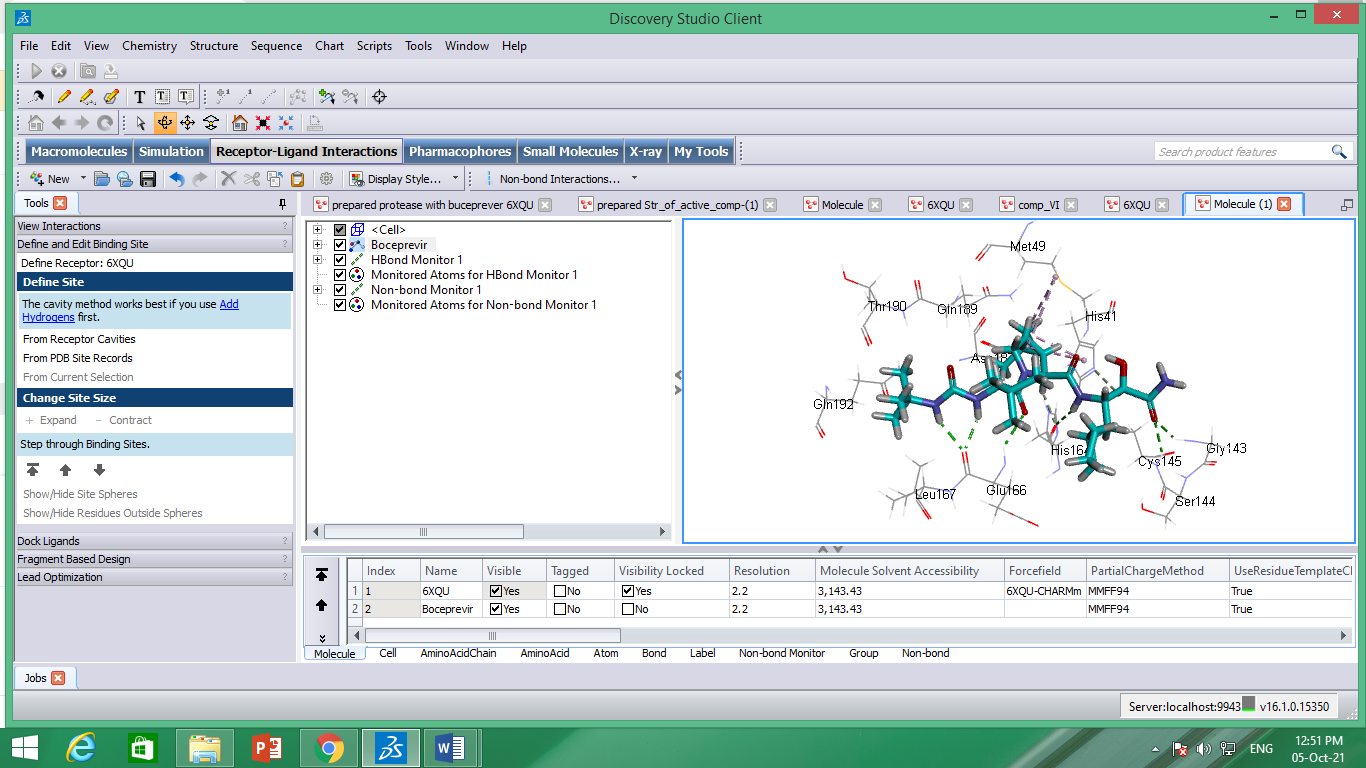


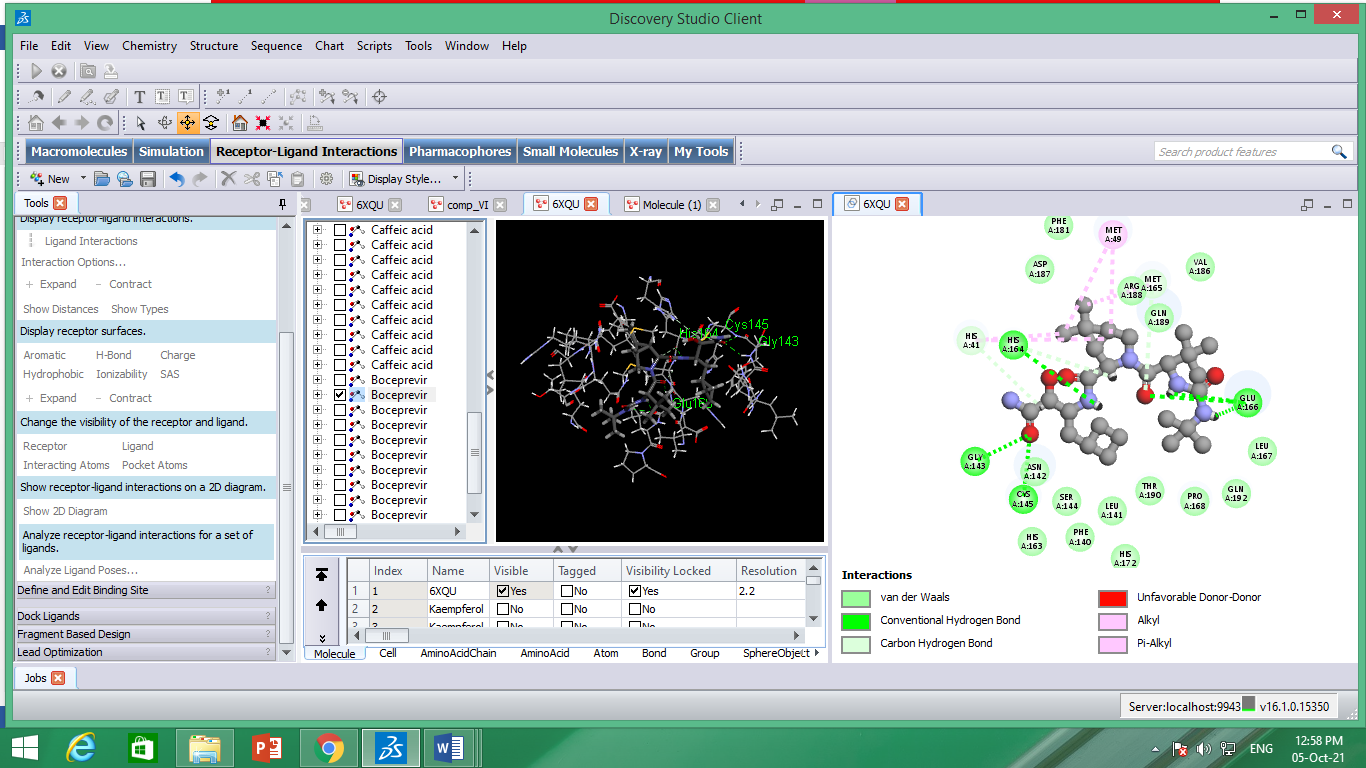


2-kaempeferol


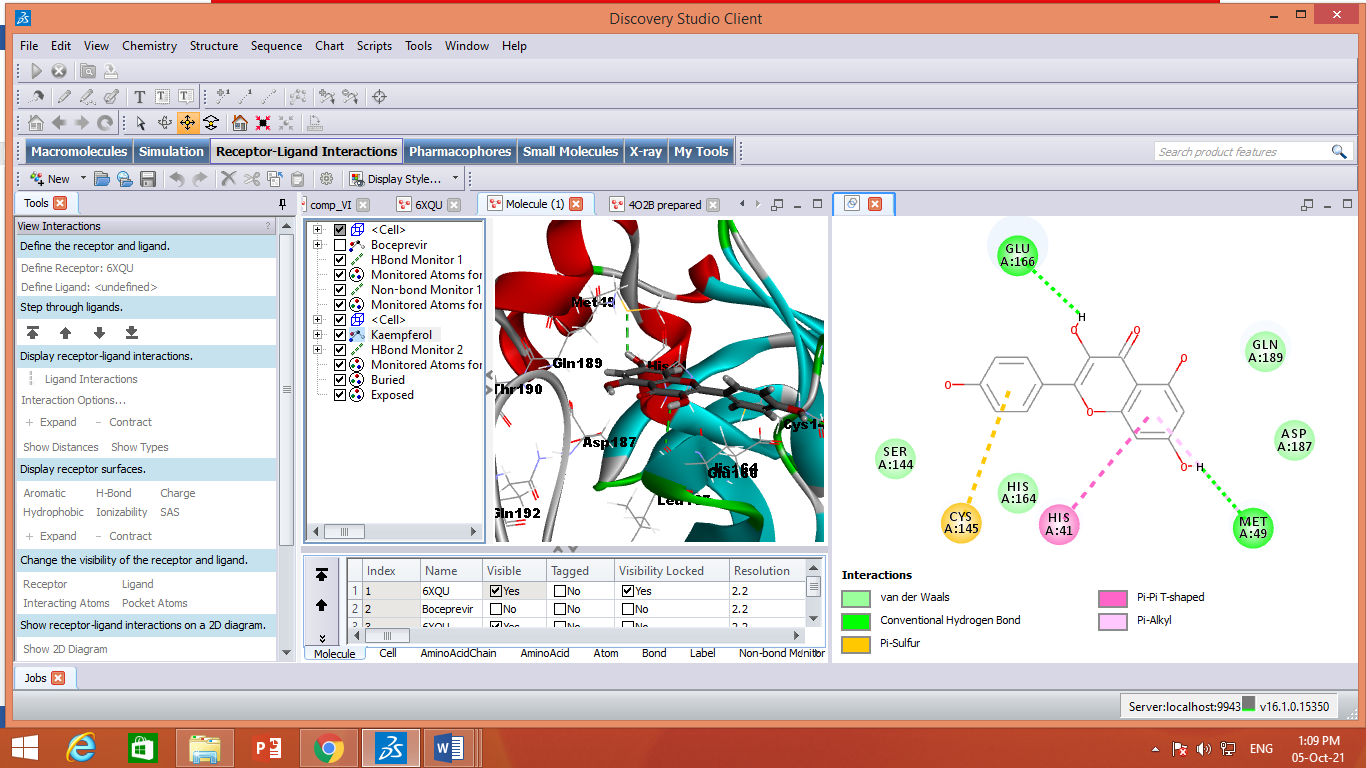


2-Quercetin


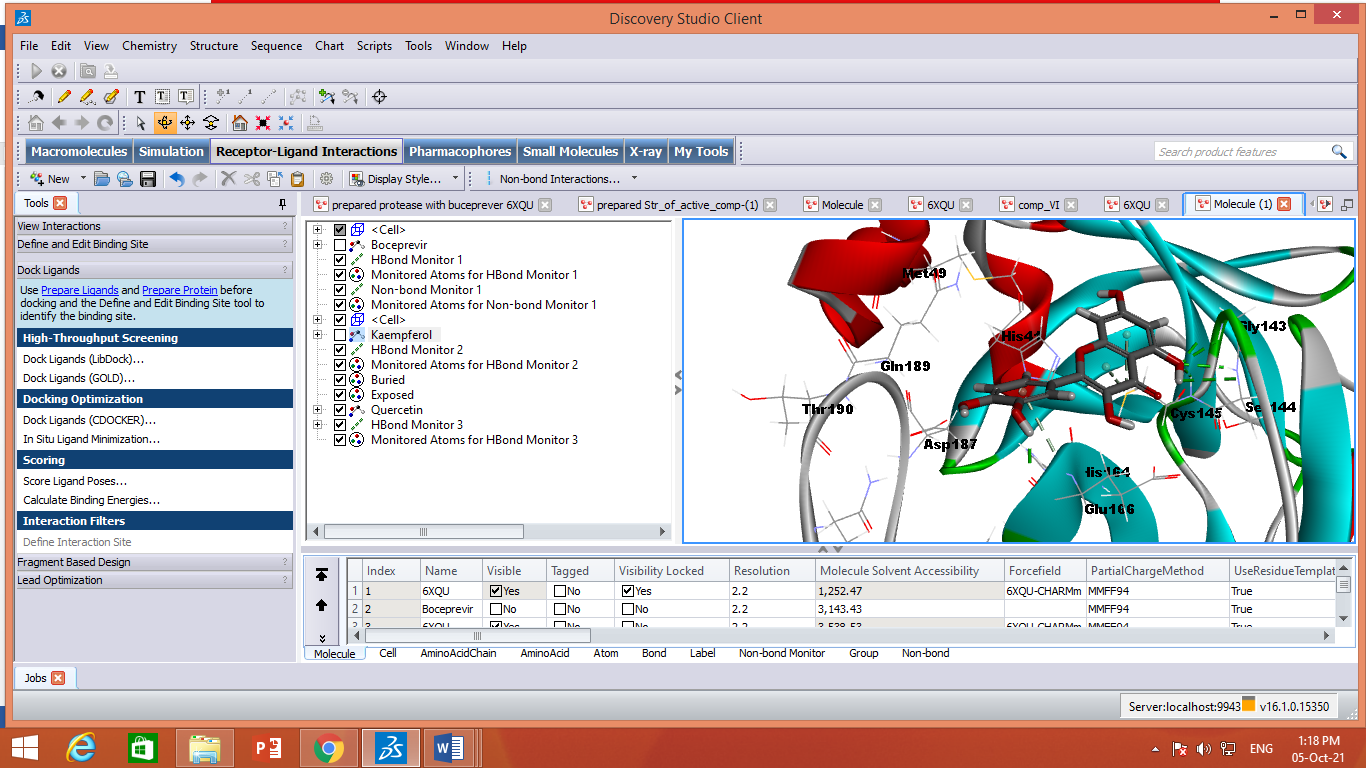


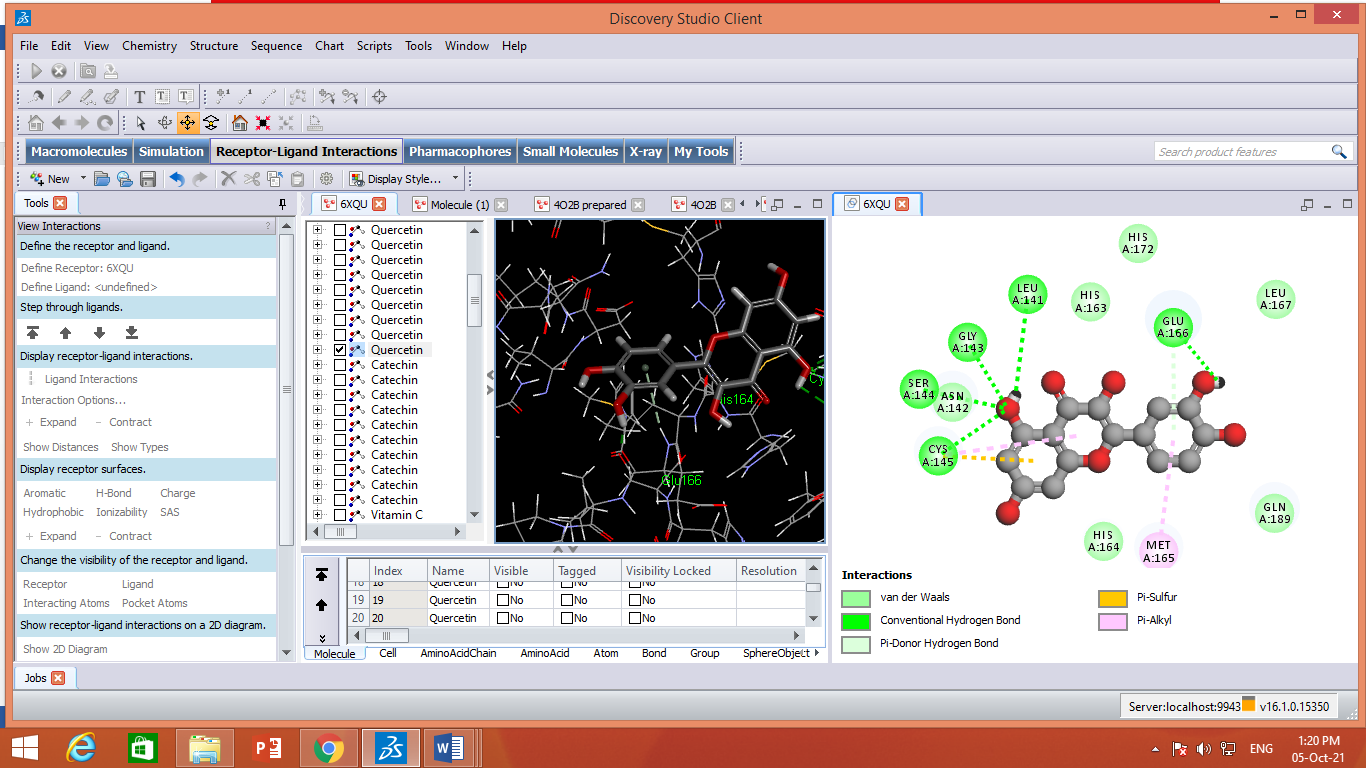


3-Vitamin C


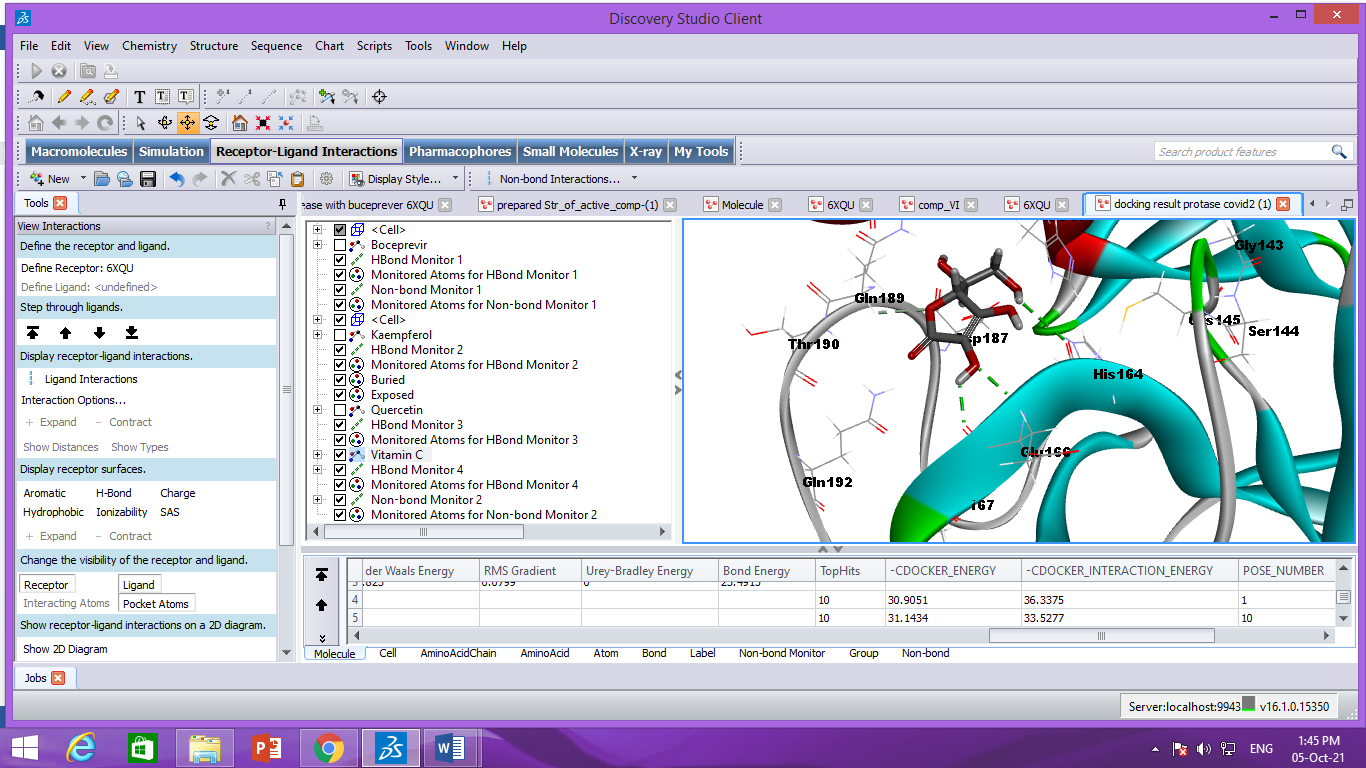


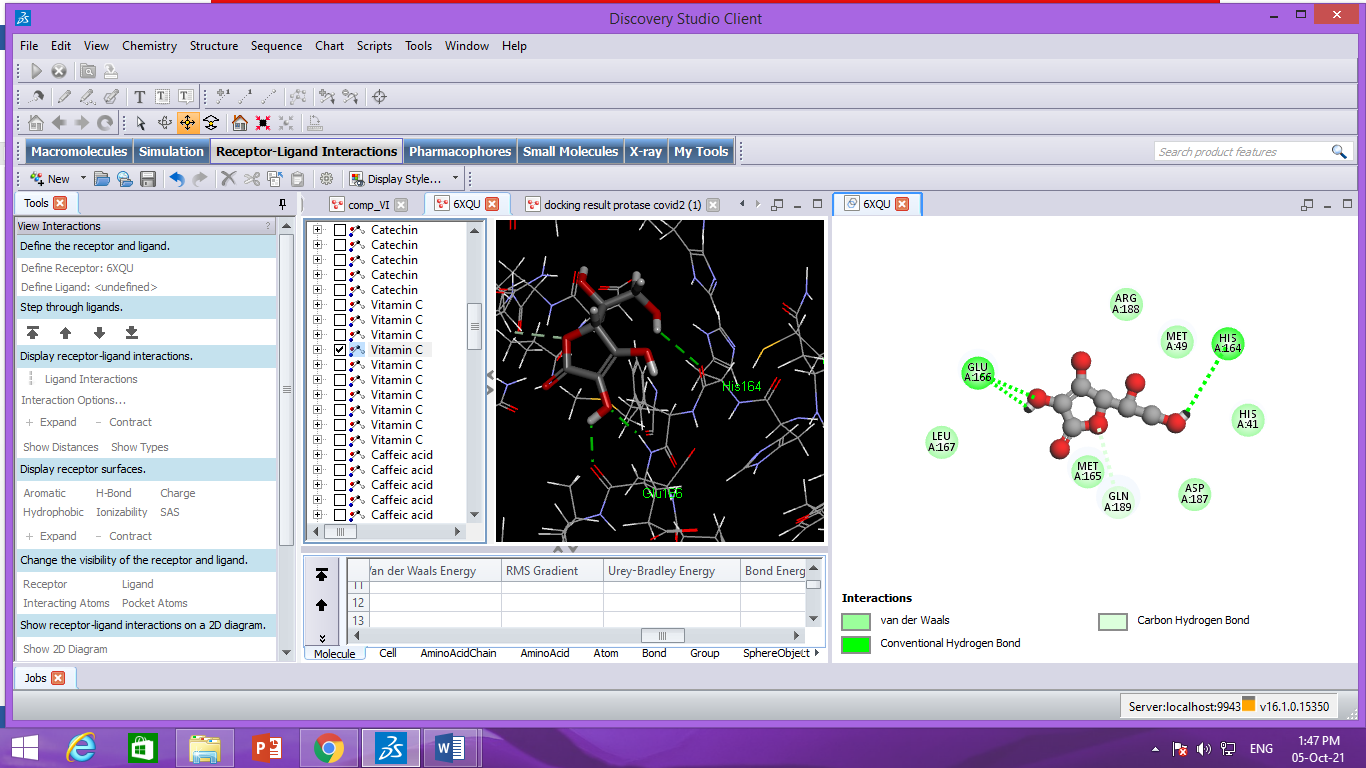


4-Catechin


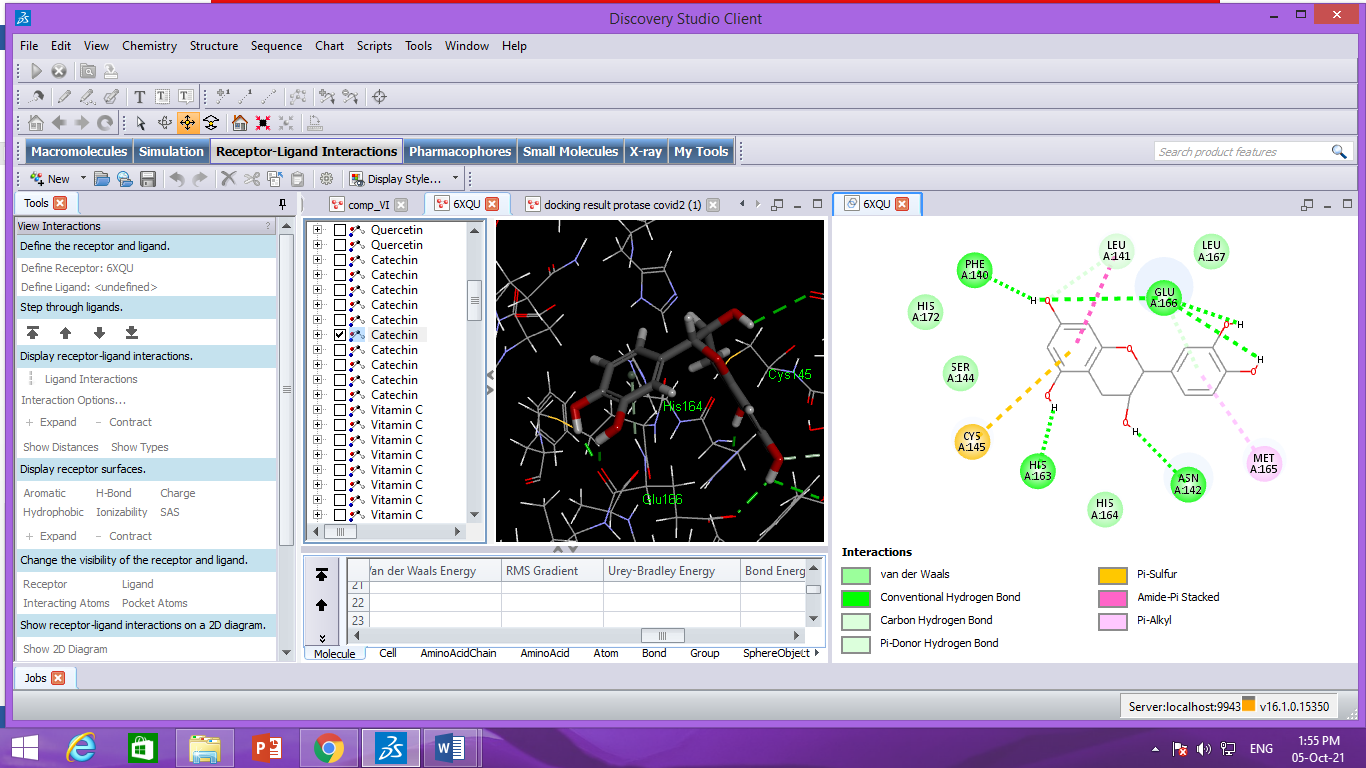


5-Cafeic acid


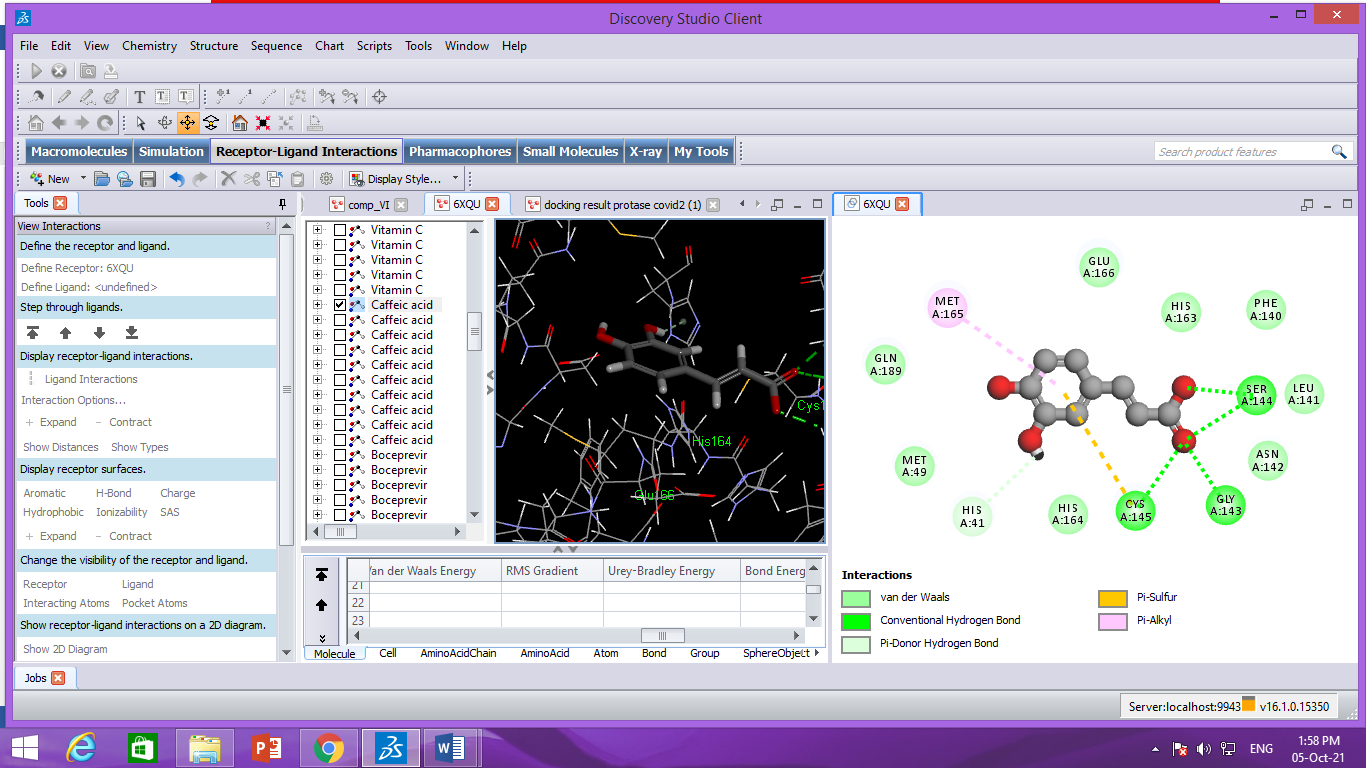


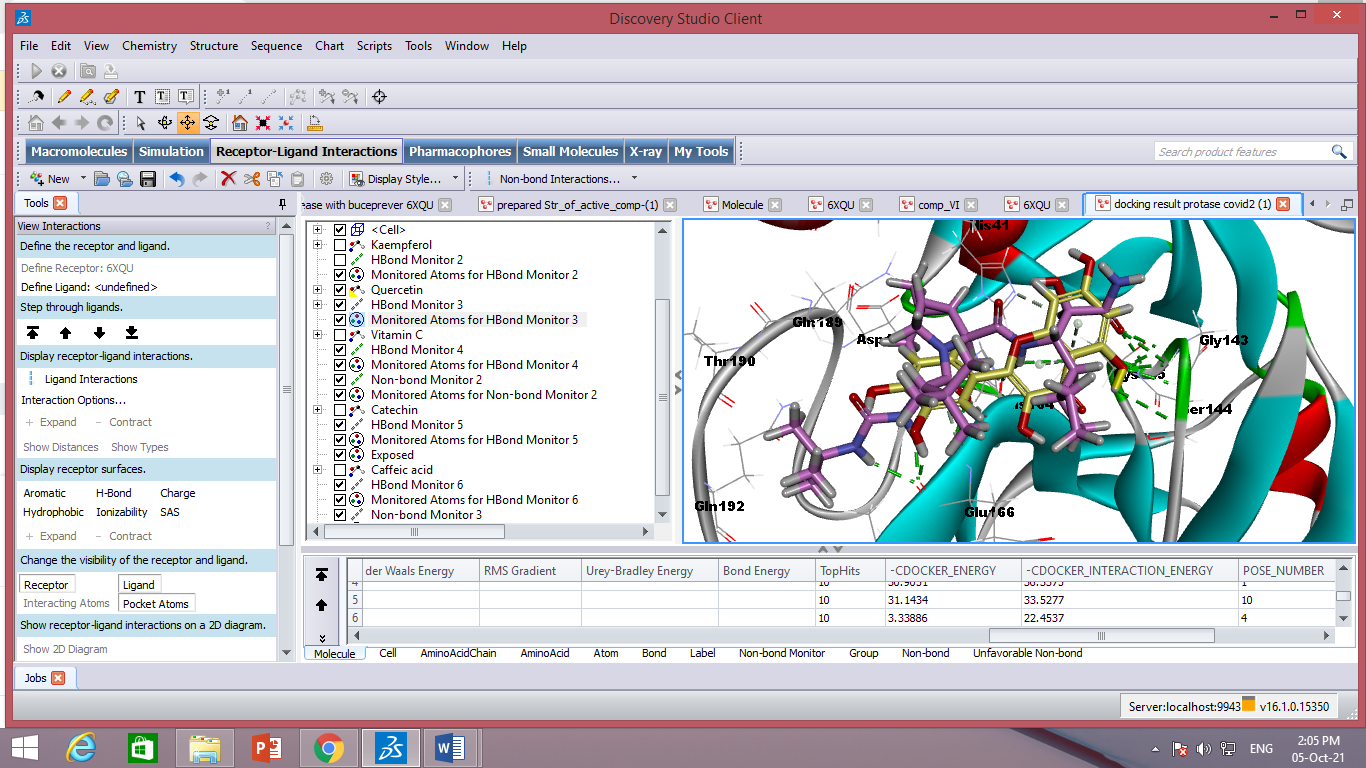


2Y9X after ZDOCK


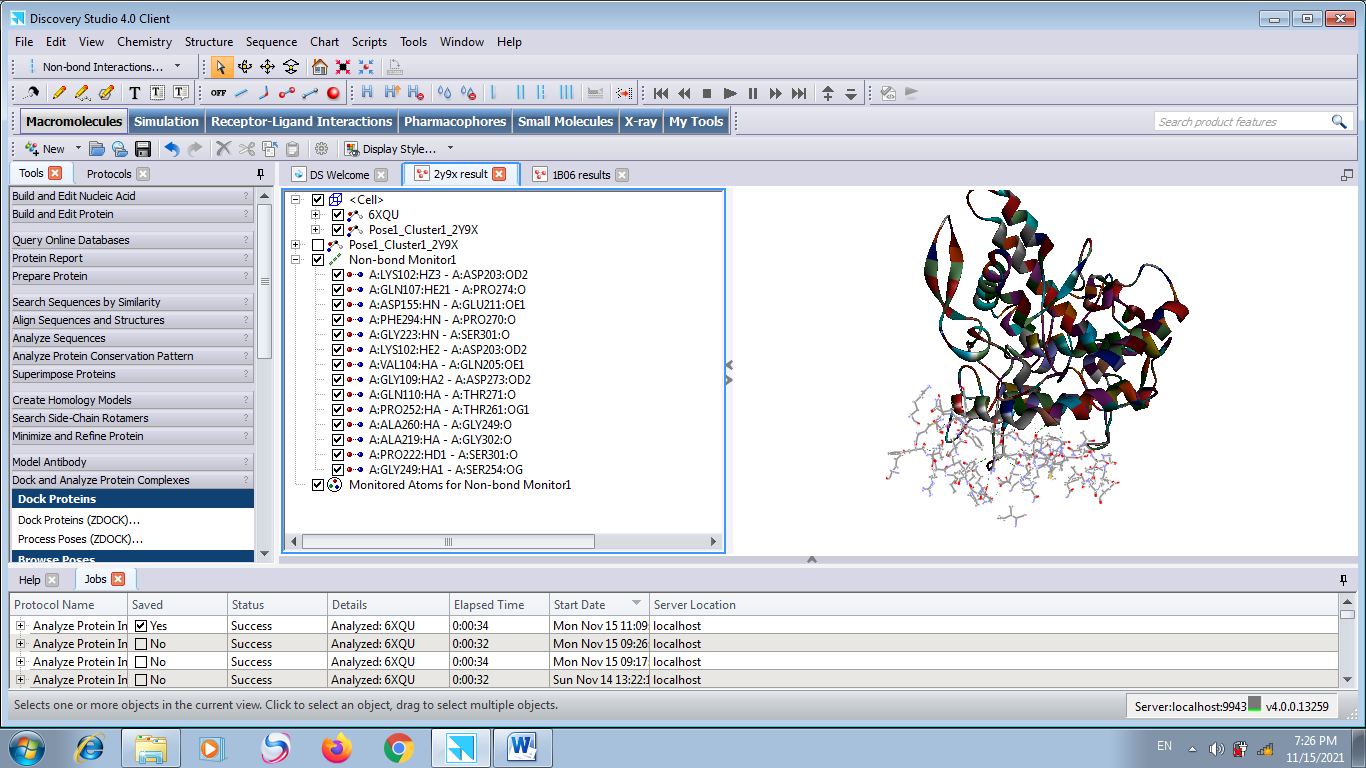


1BO6


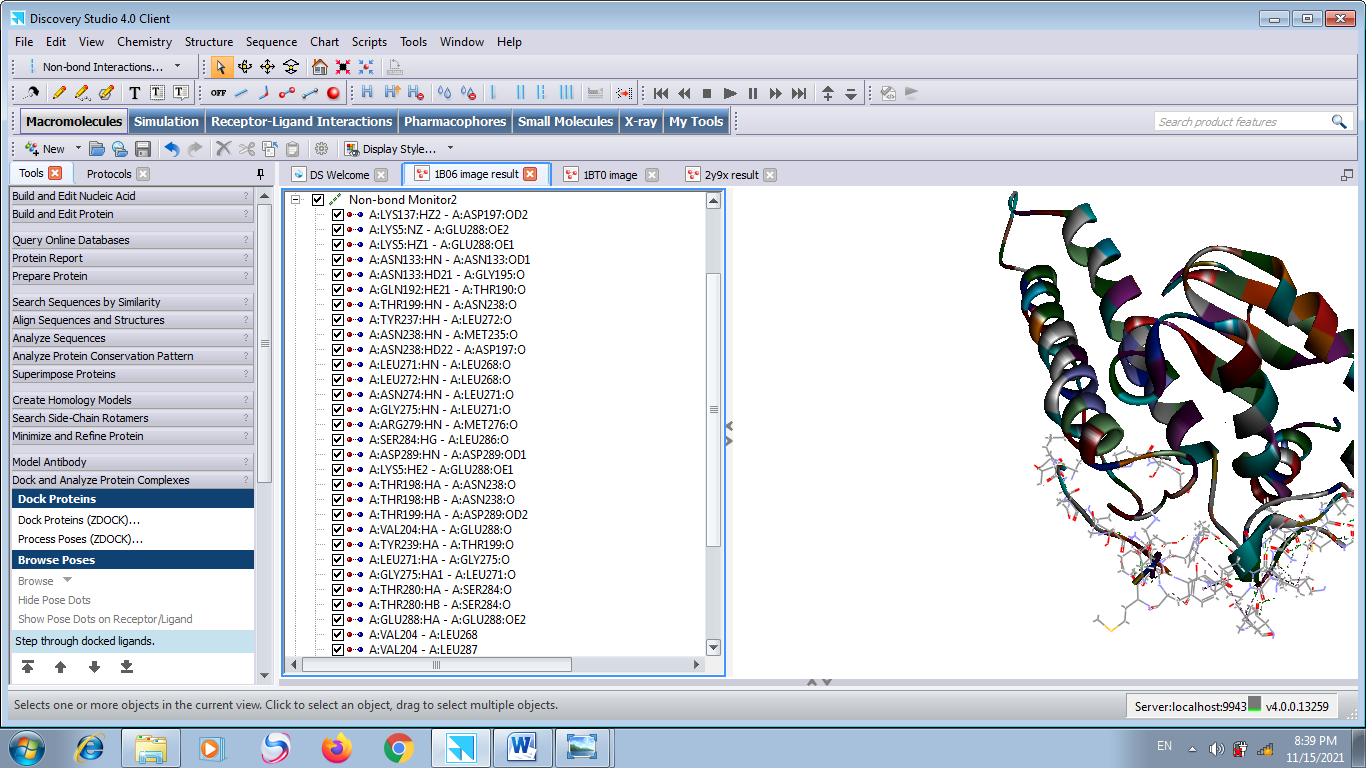


1DGG


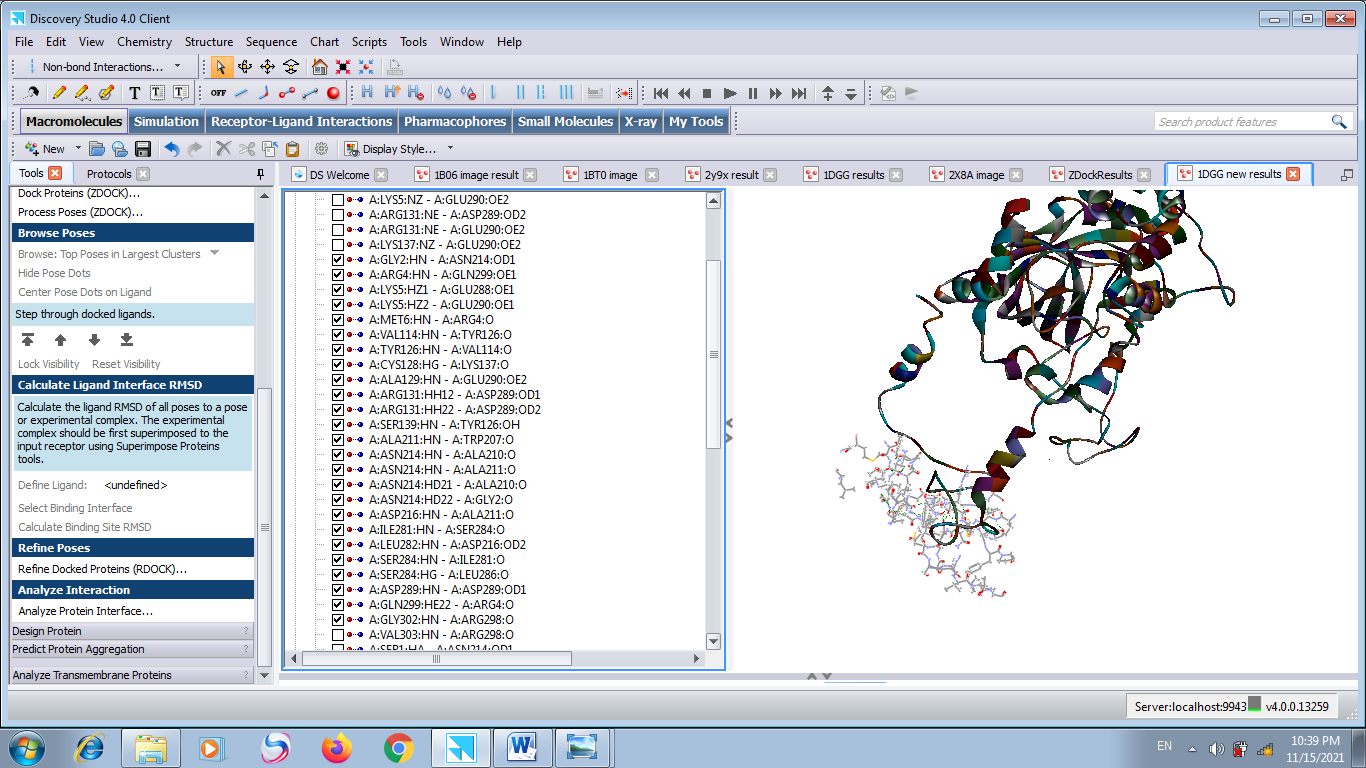


Analyze Protein Interface Results:


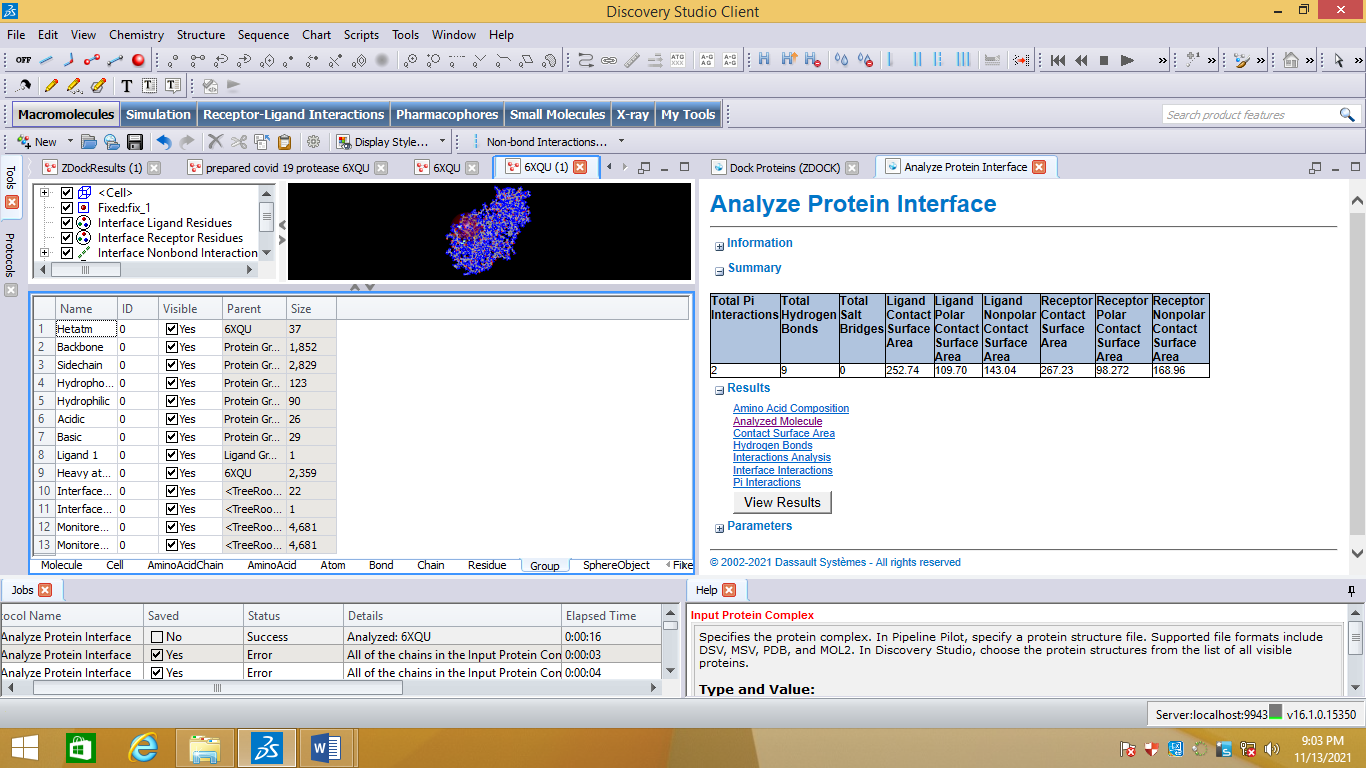


Description:


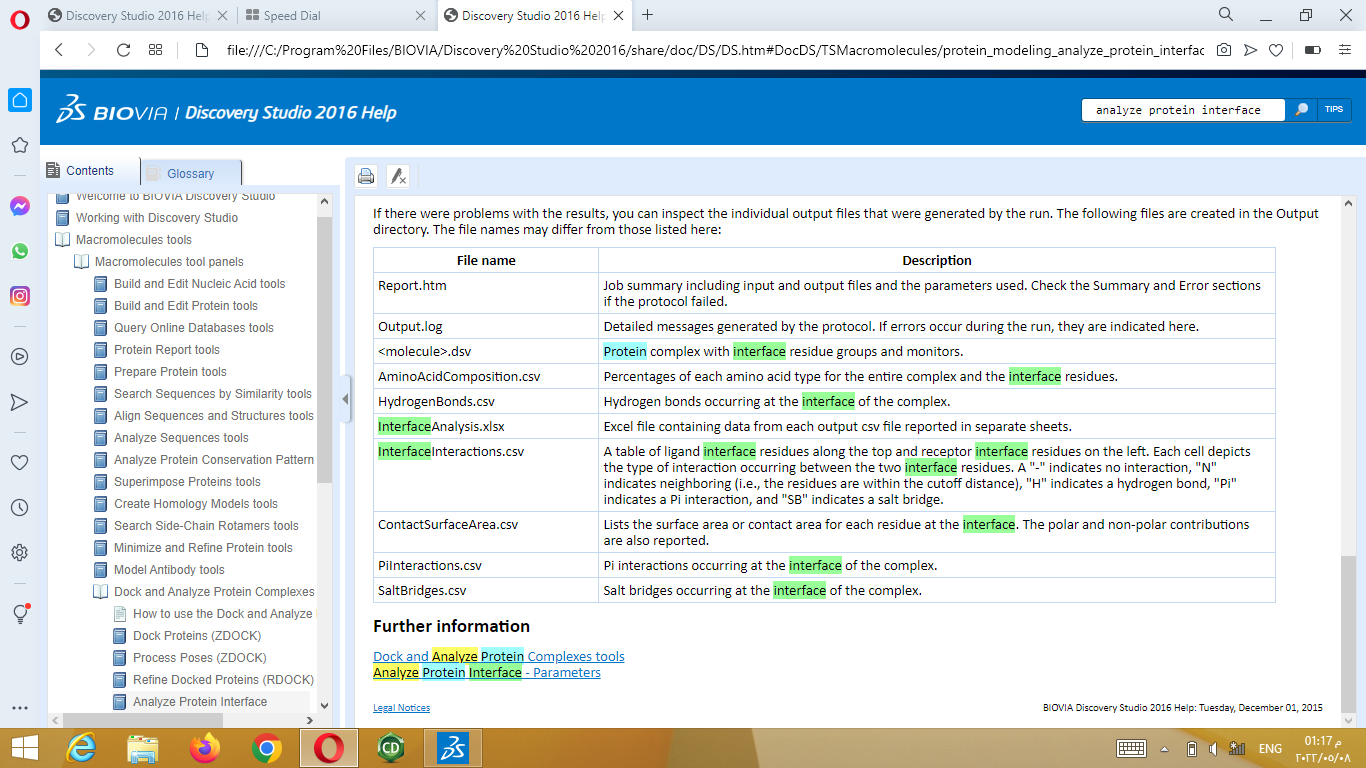


**Figure S4**. Screenshot samples of the uncropped results of the Molecular Dynamics Simulation analysis.
